# Supplementary material for: Enhanced Gut-Homing Dynamics and Pronounced Exhaustion of Mucosal and Blood CD4+ T Cells in HIV-Infected Immunological Non-Responders
Source: Frontiers journal article supplement (doi:10.3389/fimmu.2021.744155), 2021-10-07
Supplement: Data_Sheet_1.PDF [file Data_Sheet_1.PDF]

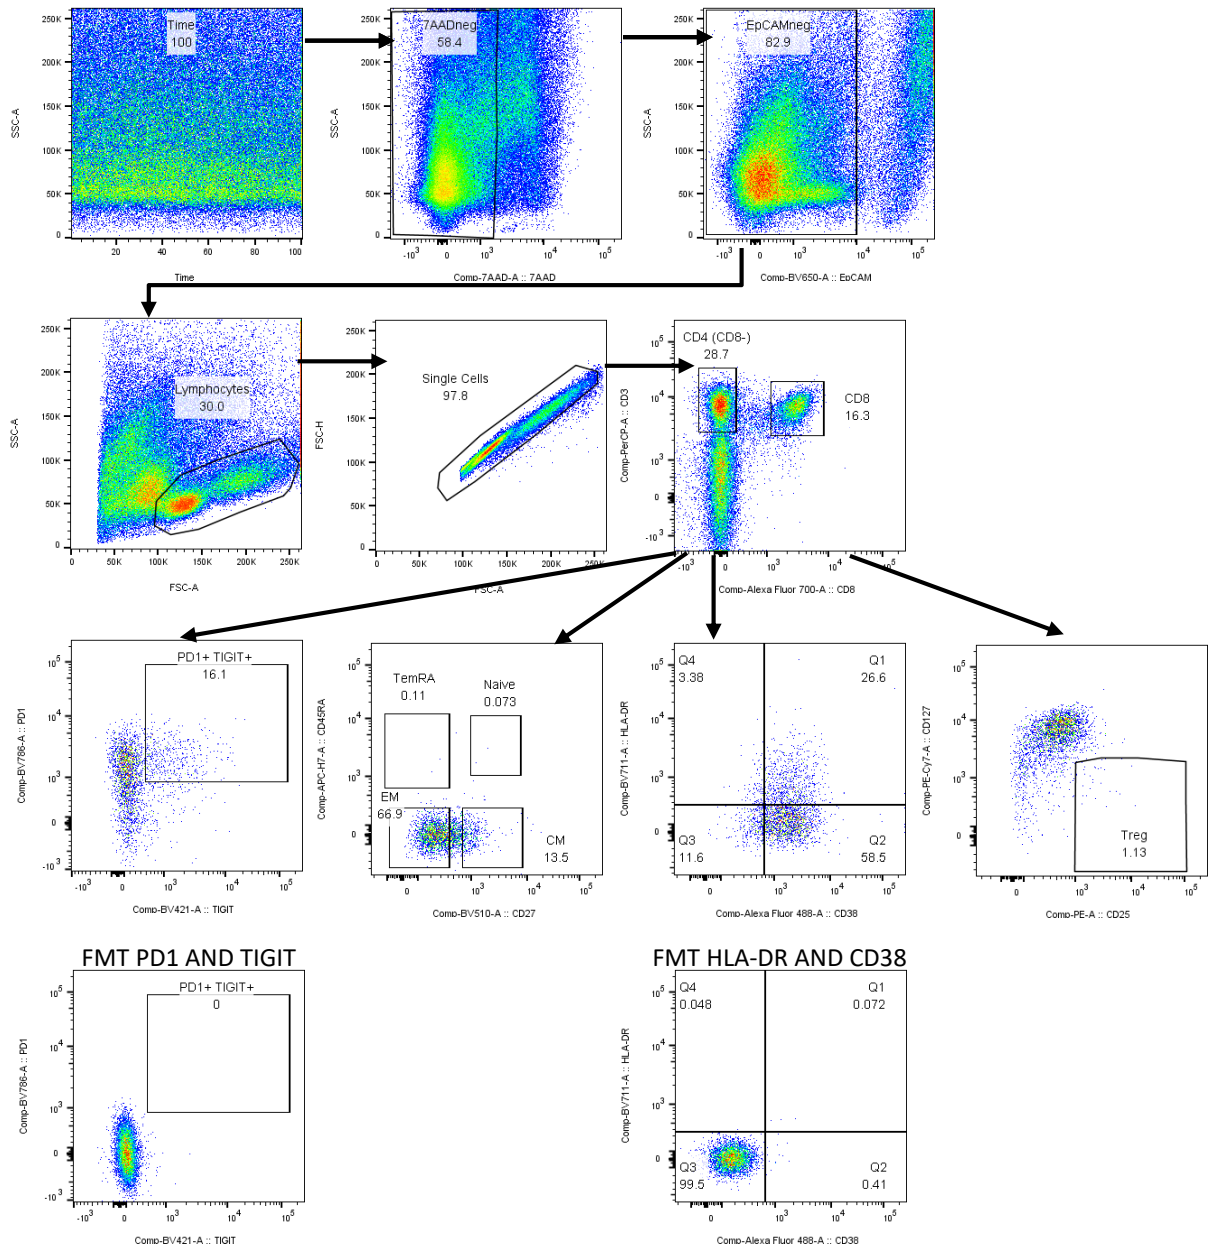

**Figure S2 Flow cytometry gating strategy for mucosal cells.** Fluorescence minus two (FMT) controls were used to set the gates of positive events for some of the surface markers.

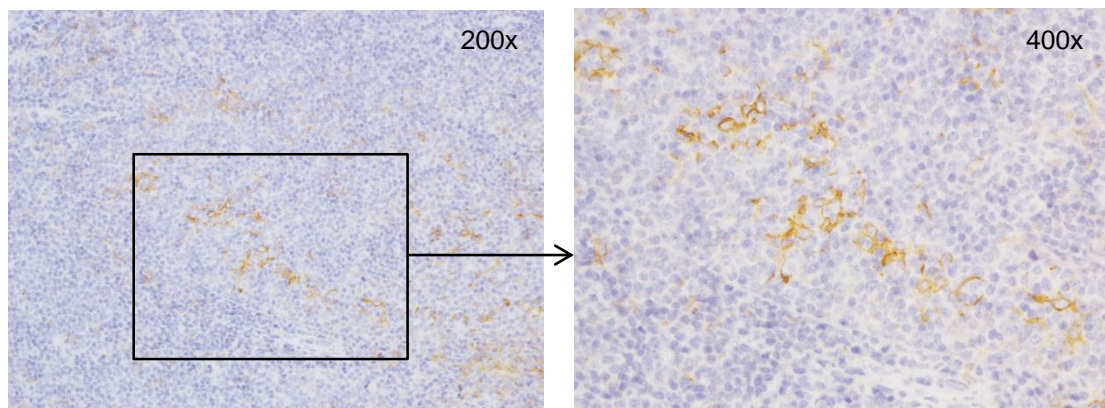

**Figure S3 Positive staining of PD-L1 in tonsil control tissue.**
